# Supplementary material for: Complete Chloroplast Genomes of Papaver rhoeas and Papaver orientale: Molecular Structures, Comparative Analysis, and Phylogenetic Analysis
Source: PubMed Central journal article supplement (PMC6017017; doi:10.3390/molecules23020437), 2018-02-16
Supplement: molecules-23-00437-s001.pdf [file molecules-23-00437-s001.pdf]

# Complete Chloroplast Genomes of *Papaver rhoeas* and *Papaver orientale*: Molecular Structures, Comparative Analysis, and Phylogenetic Analysis

Jianguo Zhou<sup>1</sup>, Yingxian Cui<sup>1</sup>, Xinlian Chen<sup>1</sup>, Ying Li<sup>1</sup>, Zhichao Xu<sup>1</sup>, Baozhong Duan<sup>2</sup>, Yonghua Li<sup>3</sup>, Jingyuan Song<sup>1</sup> and Hui Yao<sup>‡</sup>

- <sup>1</sup> Key Lab of Chinese Medicine Resources Conservation, State Administration of Traditional Chinese Medicine of the People's Republic of China, Institute of Medicinal Plant Development, Chinese Academy of Medical Sciences & Peking Union Medical College, Beijing, 100193, China. jgzhou1316@163.com (J.Z.); yxcui2017@163.com (Y.C.); chenxinlian1053@163.com (X.C.); liying@implad.ac.cn (Y.L.); zcxu@implad.ac.cn (Z.X.); jysong@implad.ac.cn (J.S.)
  - <sup>2</sup> College of Pharmaceutical Science, Dali University, Dali, 671000, Yunnan, China; bzduan@126.com (B.D.)
  - <sup>3</sup> Department of Pharmacy, Guangxi Traditional Chinese Medicine University, Nanning 530200, China; liyonghua185@126.com
- \* Correspondence: scauyao@sina.com; Tel.: +86-10-57833194.

## Supplementary Materials

Table S1. Comparisons among the chloroplast genome characteristics of *P. rhoeas*, *P. orientale*, *P. somniferum*, *C. hylomeconoides*, *A. thaliana*, and *N. tabacum*.

Table S2. Codon usage within the chloroplast genomes of *P. rhoeas*.

Table S3. Codon usage within the chloroplast genomes of *P. orientale*.

Table S4: Simple sequence repeats (SSRs) in the chloroplast genome of *P. rhoeas*.

Table S5: Simple sequence repeats (SSRs) in the chloroplast genome of *P. orientale*.

Table S6: Primer sequences at the boundaries between single copy and IR regions.

Table S7: GenBank accession numbers of dicots with complete chloroplast genome sequences used for phylogenetic analyses.

**Table S1. Comparisons among the chloroplast genome characteristics of *P. somniferum*, *C. hylomeconoides*, *A. thaliana*, and *N. tabacum*.**

| <b>Species</b>                 | <b><i>P. rhoeas</i></b> | <b><i>P. orientale</i></b> | <b><i>P. somniferum</i></b> | <b><i>C. hylomeconoides</i></b> | <b><i>A. thaliana</i></b> | <b><i>N. tabacum</i></b> |
|--------------------------------|-------------------------|----------------------------|-----------------------------|---------------------------------|---------------------------|--------------------------|
| Family                         | Papaveraceae            | Papaveraceae               | Papaveraceae                | Papaveraceae                    | Cruciferae                | Solanaceae               |
| Accession No.                  | MF943221                | MF943222                   | KU204905                    | KT274030                        | KX551970                  | Z00044                   |
| Genome size (bp)               | 152,905                 | 152,799                    | 152,931                     | 158,824                         | 154,515                   | 155,844                  |
| LSC length (bp)                | 83,172                  | 83,151                     | 83,029                      | 86,916                          | 84,170                    | 86,684                   |
| SSC length (bp)                | 17,971                  | 17,934                     | 17,920                      | 18,538                          | 17780                     | 18,482                   |
| IR length (bp)                 | 25,881                  | 25,857                     | 25,991                      | 26,685                          | 26264                     | 25,339                   |
| GC content (%)                 | 38.8                    | 38.6                       | 38.9                        | 38.8                            | 36.3                      | 37.8                     |
| Number of genes                | 130                     | 130                        | 130                         | 130                             | 132                       | 146                      |
| Number of protein-coding genes | 85                      | 85                         | 85                          | 85                              | 87                        | 101                      |
| Number of tRNAs                | 37                      | 37                         | 37                          | 37                              | 37                        | 37                       |
| Number of rRNAs                | 8                       | 8                          | 8                           | 8                               | 8                         | 8                        |

**Table S2. Codon usage within the chloroplast genomes of *P. rhoeas*.**

| Amino acid | Codon | No.  | RSCU | tRNA               | Amino acid | Codon | No.  | RSCU | tRNA            |
|------------|-------|------|------|--------------------|------------|-------|------|------|-----------------|
| Phe        | UUU   | 906  | 1.26 |                    | Tyr        | UAU   | 775  | 1.63 |                 |
| Phe        | UUC   | 537  | 0.74 | <i>trnF-GAA</i>    | Tyr        | UAC   | 174  | 0.37 | <i>trnY-GUA</i> |
| Leu        | UUA   | 797  | 1.77 | <i>trnL-UAA</i>    | Stop       | UAA   | 44   | 1.55 |                 |
| Leu        | UUG   | 551  | 1.22 | <i>trnL-CAA</i>    | Stop       | UAG   | 23   | 0.81 |                 |
| Leu        | CUU   | 602  | 1.34 |                    | His        | CAU   | 480  | 1.51 |                 |
| Leu        | CUC   | 196  | 0.43 |                    | His        | CAC   | 154  | 0.49 | <i>trnH-GUG</i> |
| Leu        | CUA   | 375  | 0.83 | <i>trnL-UAG</i>    | Gln        | CAA   | 686  | 1.52 | <i>trnQ-UUG</i> |
| Leu        | CUG   | 183  | 0.41 |                    | Gln        | CAG   | 218  | 0.48 |                 |
| Ile        | AUU   | 1038 | 1.45 |                    | Asn        | AAU   | 936  | 1.51 |                 |
| Ile        | AUC   | 434  | 0.6  | <i>trnI-GAU</i>    | Asn        | AAC   | 306  | 0.49 | <i>trnN-GUU</i> |
| Ile        | AUA   | 683  | 0.95 | <i>trnI-CAU</i>    | Lys        | AAA   | 1016 | 1.48 | <i>trnK-UUU</i> |
| Met        | AUG   | 624  | 1    | <i>trn(f)M-CAU</i> | Lys        | AAG   | 356  | 0.52 |                 |
| Val        | GUU   | 537  | 1.48 |                    | Asp        | GAU   | 849  | 1.55 |                 |
| Val        | GUC   | 185  | 0.51 | <i>trnV-GAC</i>    | Asp        | GAC   | 246  | 0.45 | <i>trnD-GUC</i> |
| Val        | GUA   | 533  | 1.47 | <i>trnV-UAC</i>    | Glu        | GAA   | 971  | 1.44 | <i>trnE-UUC</i> |
| Val        | GUG   | 199  | 0.55 |                    | Glu        | GAG   | 373  | 0.56 |                 |
| Ser        | UCU   | 559  | 1.63 |                    | Cys        | UGU   | 219  | 1.41 |                 |
| Ser        | UCC   | 349  | 1.02 | <i>trnS-GGA</i>    | Cys        | UGC   | 91   | 0.59 | <i>trnC-GCA</i> |
| Ser        | UCA   | 444  | 1.3  | <i>trnS-UGA</i>    | Stop       | UGA   | 18   | 0.64 |                 |
| Ser        | UCG   | 174  | 0.51 |                    | Trp        | UGG   | 468  | 1    | <i>trnW-CCA</i> |
| Pro        | CCU   | 424  | 1.55 |                    | Arg        | CGU   | 357  | 1.34 | <i>trnR-ACG</i> |
| Pro        | CCC   | 210  | 0.77 |                    | Arg        | CGC   | 105  | 0.4  |                 |
| Pro        | CCA   | 318  | 1.16 | <i>trnP-UGG</i>    | Arg        | CGA   | 342  | 1.29 |                 |
| Pro        | CCG   | 141  | 0.52 |                    | Arg        | CGG   | 122  | 0.46 |                 |
| Thr        | ACU   | 500  | 1.5  |                    | Arg        | AGA   | 397  | 1.16 | <i>trnR-UCU</i> |
| Thr        | ACC   | 262  | 0.78 | <i>trnT-GGU</i>    | Arg        | AGG   | 132  | 0.39 |                 |
| Thr        | ACA   | 408  | 1.22 | <i>trnT-UGU</i>    | Ser        | AGU   | 497  | 1.87 |                 |
| Thr        | ACG   | 167  | 0.5  |                    | Ser        | AGC   | 170  | 0.64 | <i>trnS-GCU</i> |
| Ala        | GCU   | 597  | 1.73 |                    | Gly        | GGU   | 588  | 1.31 |                 |
| Ala        | GCC   | 235  | 0.68 |                    | Gly        | GGC   | 175  | 0.39 | <i>trnG-GCC</i> |
| Ala        | GCA   | 386  | 1.12 | <i>trnA-UGC</i>    | Gly        | GGA   | 690  | 1.54 | <i>trnG-UCC</i> |
| Ala        | GCG   | 166  | 0.48 |                    | Gly        | GGG   | 341  | 0.76 |                 |

**Table S3. Codon usage within the chloroplast genomes of *P. orientale*.**

| Amino acid | Codon | No.  | RSCU | tRNA               | Amino acid | Codon | No.  | RSCU | tRNA            |
|------------|-------|------|------|--------------------|------------|-------|------|------|-----------------|
| Phe        | UUU   | 901  | 1.25 |                    | Tyr        | UAU   | 770  | 1.64 |                 |
| Phe        | UUC   | 538  | 0.75 | <i>trnF-GAA</i>    | Tyr        | UAC   | 170  | 0.36 | <i>trnY-GUA</i> |
| Leu        | UUA   | 799  | 1.77 | <i>trnL-UAA</i>    | Stop       | UAA   | 45   | 1.59 |                 |
| Leu        | UUG   | 554  | 1.23 | <i>trnL-CAA</i>    | Stop       | UAG   | 23   | 0.81 |                 |
| Leu        | CUU   | 599  | 1.33 |                    | His        | CAU   | 485  | 1.51 |                 |
| Leu        | CUC   | 200  | 0.44 |                    | His        | CAC   | 156  | 0.49 | <i>trnH-GUG</i> |
| Leu        | CUA   | 366  | 0.81 | <i>trnL-UAG</i>    | Gln        | CAA   | 688  | 1.52 | <i>trnQ-UUG</i> |
| Leu        | CUG   | 189  | 0.42 |                    | Gln        | CAG   | 218  | 0.48 |                 |
| Ile        | AUU   | 1040 | 1.45 |                    | Asn        | AAU   | 927  | 1.49 |                 |
| Ile        | AUC   | 441  | 0.61 | <i>trnI-GAU</i>    | Asn        | AAC   | 314  | 0.51 | <i>trnN-GUU</i> |
| Ile        | AUA   | 678  | 0.94 | <i>trnI-CAU</i>    | Lys        | AAA   | 1010 | 1.47 | <i>trnK-UUU</i> |
| Met        | AUG   | 624  | 1    | <i>trn(f)M-CAU</i> | Lys        | AAG   | 367  | 0.53 |                 |
| Val        | GUU   | 540  | 1.48 |                    | Asp        | GAU   | 849  | 1.55 |                 |
| Val        | GUC   | 186  | 0.51 | <i>trnV-GAC</i>    | Asp        | GAC   | 250  | 0.45 | <i>trnD-GUC</i> |
| Val        | GUA   | 530  | 1.45 | <i>trnV-UAC</i>    | Glu        | GAA   | 973  | 1.44 | <i>trnE-UUC</i> |
| Val        | GUG   | 204  | 0.56 |                    | Glu        | GAG   | 378  | 0.56 |                 |
| Ser        | UCU   | 562  | 1.64 |                    | Cys        | UGU   | 215  | 1.39 |                 |
| Ser        | UCC   | 345  | 1.01 | <i>trnS-GGA</i>    | Cys        | UGC   | 95   | 0.61 | <i>trnC-GCA</i> |
| Ser        | UCA   | 439  | 1.28 | <i>trnS-UGA</i>    | Stop       | UGA   | 17   | 0.6  |                 |
| Ser        | UCG   | 181  | 0.53 |                    | Trp        | UGG   | 468  | 1    | <i>trnW-CCA</i> |
| Pro        | CCU   | 424  | 1.54 |                    | Arg        | CGU   | 354  | 1.33 | <i>trnR-ACG</i> |
| Pro        | CCC   | 207  | 0.75 |                    | Arg        | CGC   | 103  | 0.39 |                 |
| Pro        | CCA   | 323  | 1.17 | <i>trnP-UGG</i>    | Arg        | CGA   | 348  | 1.31 |                 |
| Pro        | CCG   | 147  | 0.53 |                    | Arg        | CGG   | 122  | 0.46 |                 |
| Thr        | ACU   | 502  | 1.5  |                    | Arg        | AGA   | 398  | 1.16 | <i>trnR-UCU</i> |
| Thr        | ACC   | 257  | 0.77 | <i>trnT-GGU</i>    | Arg        | AGG   | 133  | 0.39 |                 |
| Thr        | ACA   | 418  | 1.25 | <i>trnT-UGU</i>    | Ser        | AGU   | 495  | 1.86 |                 |
| Thr        | ACG   | 163  | 0.49 |                    | Ser        | AGC   | 171  | 0.64 | <i>trnS-GCU</i> |
| Ala        | GCU   | 603  | 1.72 |                    | Gly        | GGU   | 591  | 1.32 |                 |
| Ala        | GCC   | 234  | 0.67 |                    | Gly        | GGC   | 176  | 0.39 | <i>trnG-GCC</i> |
| Ala        | GCA   | 393  | 1.12 | <i>trnA-UGC</i>    | Gly        | GGA   | 692  | 1.54 | <i>trnG-UCC</i> |
| Ala        | GCG   | 169  | 0.48 |                    | Gly        | GGG   | 338  | 0.75 |                 |

**Table S4.** Simple sequence repeats (SSRs) in the chloroplast genome of *P. rhoeas*.

| SSR type | SSR     | size(bp) | start | end   | Region |
|----------|---------|----------|-------|-------|--------|
| p3       | (AAG)3  | 9        | 599   | 607   | LSC    |
| p1       | (A)8    | 8        | 1606  | 1613  | LSC    |
| p3       | (GAA)3  | 9        | 2014  | 2022  | LSC    |
| p1       | (T)9    | 9        | 2188  | 2196  | LSC    |
| p3       | (GAA)3  | 9        | 2826  | 2834  | LSC    |
| p1       | (T)8    | 8        | 3210  | 3217  | LSC    |
| p3       | (ATA)3  | 9        | 3550  | 3558  | LSC    |
| p1       | (A)8    | 8        | 6087  | 6094  | LSC    |
| p1       | (A)12   | 12       | 7182  | 7193  | LSC    |
| p1       | (T)9    | 9        | 8019  | 8027  | LSC    |
| p1       | (A)8    | 8        | 8093  | 8100  | LSC    |
| p3       | (AAC)3  | 9        | 8510  | 8518  | LSC    |
| p1       | (T)8    | 8        | 9325  | 9332  | LSC    |
| p1       | (T)9    | 9        | 9677  | 9685  | LSC    |
| p1       | (A)8    | 8        | 13216 | 13223 | LSC    |
| p4       | (AAAT)3 | 12       | 13682 | 13693 | LSC    |
| p4       | (GGTT)3 | 12       | 14271 | 14282 | LSC    |
| p3       | (AAC)3  | 9        | 14773 | 14781 | LSC    |
| p3       | (TTA)3  | 9        | 15582 | 15590 | LSC    |
| p1       | (T)9    | 9        | 18410 | 18418 | LSC    |
| p1       | (T)11   | 11       | 18516 | 18526 | LSC    |
| p1       | (A)8    | 8        | 18659 | 18666 | LSC    |
| p2       | (AT)4   | 8        | 19799 | 19806 | LSC    |
| p2       | (AT)5   | 10       | 19889 | 19898 | LSC    |
| p3       | (ATT)3  | 9        | 21148 | 21156 | LSC    |
| p3       | (TTC)3  | 9        | 22143 | 22151 | LSC    |
| p1       | (A)8    | 8        | 22327 | 22334 | LSC    |
| p1       | (T)8    | 8        | 26022 | 26029 | LSC    |
| p1       | (T)8    | 8        | 26128 | 26135 | LSC    |
| p3       | (TAT)3  | 9        | 27041 | 27049 | LSC    |
| p2       | (AT)5   | 10       | 27370 | 27379 | LSC    |
| p1       | (A)8    | 8        | 27695 | 27702 | LSC    |
| p1       | (A)8    | 8        | 29610 | 29617 | LSC    |
| p4       | (AGAT)3 | 12       | 29678 | 29689 | LSC    |
| p2       | (CT)4   | 8        | 30066 | 30073 | LSC    |
| p3       | (TTA)3  | 9        | 30225 | 30233 | LSC    |
| p1       | (A)8    | 8        | 31063 | 31070 | LSC    |
| p3       | (TTA)3  | 9        | 31430 | 31438 | LSC    |
| p2       | (GA)5   | 10       | 32330 | 32339 | LSC    |
| p1       | (G)8    | 8        | 34191 | 34198 | LSC    |
| p2       | (GA)4   | 8        | 35229 | 35236 | LSC    |
| p3       | (TCT)3  | 9        | 36840 | 36848 | LSC    |

|    |         |    |       |       |     |
|----|---------|----|-------|-------|-----|
| p3 | (TAT)3  | 9  | 36891 | 36899 | LSC |
| p3 | (ATG)3  | 9  | 38383 | 38391 | LSC |
| p3 | (TTG)3  | 9  | 39988 | 39996 | LSC |
| p3 | (GCA)3  | 9  | 40281 | 40289 | LSC |
| p3 | (ACC)3  | 9  | 41099 | 41107 | LSC |
| p1 | (T)8    | 8  | 41759 | 41766 | LSC |
| p4 | (AACA)3 | 12 | 44487 | 44498 | LSC |
| p2 | (TA)4   | 8  | 45481 | 45488 | LSC |
| p2 | (AT)4   | 8  | 46141 | 46148 | LSC |
| p1 | (T)8    | 8  | 46767 | 46774 | LSC |
| p2 | (AG)4   | 8  | 47573 | 47580 | LSC |
| p2 | (TA)4   | 8  | 47816 | 47823 | LSC |
| p1 | (T)8    | 8  | 47910 | 47917 | LSC |
| p1 | (A)8    | 8  | 50156 | 50163 | LSC |
| p1 | (T)8    | 8  | 51463 | 51470 | LSC |
| p1 | (T)12   | 12 | 54640 | 54651 | LSC |
| p3 | (AGA)3  | 9  | 57777 | 57785 | LSC |
| p2 | (TC)4   | 8  | 60180 | 60187 | LSC |
| p1 | (T)8    | 8  | 60887 | 60894 | LSC |
| p1 | (A)9    | 9  | 61465 | 61473 | LSC |
| p2 | (AC)4   | 8  | 62016 | 62023 | LSC |
| p1 | (A)11   | 11 | 62652 | 62662 | LSC |
| p2 | (TC)4   | 8  | 63342 | 63349 | LSC |
| p2 | (TA)4   | 8  | 64113 | 64120 | LSC |
| p3 | (GTA)3  | 9  | 64154 | 64162 | LSC |
| p1 | (T)9    | 9  | 65041 | 65049 | LSC |
| p3 | (CCT)3  | 9  | 65538 | 65546 | LSC |
| p2 | (GT)4   | 8  | 66998 | 67005 | LSC |
| p3 | (AAC)3  | 9  | 67299 | 67307 | LSC |
| p3 | (ATT)3  | 9  | 67574 | 67582 | LSC |
| p2 | (TA)4   | 8  | 67617 | 67624 | LSC |
| p1 | (A)8    | 8  | 70279 | 70286 | LSC |
| p1 | (T)8    | 8  | 70324 | 70331 | LSC |
| p1 | (T)9    | 9  | 71140 | 71148 | LSC |
| p1 | (T)8    | 8  | 73914 | 73921 | LSC |
| p3 | (GGA)3  | 9  | 75397 | 75405 | LSC |
| p1 | (T)8    | 8  | 76877 | 76884 | LSC |
| p2 | (TA)4   | 8  | 77064 | 77071 | LSC |
| p1 | (T)8    | 8  | 77949 | 77956 | LSC |
| p1 | (A)10   | 10 | 78745 | 78754 | LSC |
| p3 | (GGA)3  | 9  | 79023 | 79031 | LSC |
| p1 | (T)9    | 9  | 79565 | 79573 | LSC |
| p1 | (T)8    | 8  | 81354 | 81361 | LSC |
| p2 | (CT)4   | 8  | 82478 | 82485 | LSC |

|    |           |    |        |        |     |
|----|-----------|----|--------|--------|-----|
| p2 | (TA)4     | 8  | 82504  | 82511  | LSC |
| p3 | (TGC)3    | 9  | 82720  | 82728  | LSC |
| p3 | (TTA)4    | 12 | 82953  | 82964  | LSC |
| p1 | (T)9      | 9  | 83224  | 83232  | IRa |
| p3 | (CTT)3    | 9  | 83366  | 83374  | IRa |
| p1 | (T)9      | 9  | 84806  | 84814  | IRa |
| p2 | (GA)4     | 8  | 85452  | 85459  | IRa |
| p2 | (GA)4     | 8  | 85464  | 85471  | IRa |
| p2 | (GA)4     | 8  | 86451  | 86458  | IRa |
| p3 | (CAA)3    | 9  | 86683  | 86691  | IRa |
| p1 | (G)8      | 8  | 87209  | 87216  | IRa |
| p1 | (A)9      | 9  | 87352  | 87360  | IRa |
| p2 | (GA)4     | 8  | 88603  | 88610  | IRa |
| p3 | (TCT)3    | 9  | 89292  | 89300  | IRa |
| p3 | (CTT)3    | 9  | 89404  | 89412  | IRa |
| p3 | (GGT)3    | 9  | 89668  | 89676  | IRa |
| p3 | (TGA)3    | 9  | 89910  | 89918  | IRa |
| p1 | (A)8      | 8  | 89958  | 89965  | IRa |
| p3 | (GAA)3    | 9  | 91125  | 91133  | IRa |
| p2 | (TA)4     | 8  | 91950  | 91957  | IRa |
| p3 | (AGA)3    | 9  | 94516  | 94524  | IRa |
| p3 | (AGA)3    | 9  | 95975  | 95983  | IRa |
| p6 | (TTCTTA)3 | 18 | 96244  | 96261  | IRa |
| p3 | (AAG)3    | 9  | 99195  | 99203  | IRa |
| p1 | (C)8      | 8  | 99590  | 99597  | IRa |
| p2 | (AG)4     | 8  | 101510 | 101517 | IRa |
| p3 | (CTG)3    | 9  | 103574 | 103582 | IRa |
| p2 | (CT)4     | 8  | 105121 | 105128 | IRa |
| p1 | (A)8      | 8  | 106866 | 106873 | IRa |
| p1 | (T)8      | 8  | 107263 | 107270 | IRa |
| p3 | (CAA)3    | 9  | 108611 | 108619 | IRa |
| p1 | (A)8      | 8  | 109095 | 109102 | SSC |
| p1 | (A)8      | 8  | 109765 | 109772 | SSC |
| p1 | (T)8      | 8  | 109785 | 109792 | SSC |
| p1 | (T)8      | 8  | 109872 | 109879 | SSC |
| p3 | (AAT)3    | 9  | 110211 | 110219 | SSC |
| p3 | (TAA)3    | 9  | 110708 | 110716 | SSC |
| p1 | (T)9      | 9  | 111294 | 111302 | SSC |
| p3 | (TTA)4    | 12 | 111531 | 111542 | SSC |
| p1 | (A)9      | 9  | 112035 | 112043 | SSC |
| p1 | (T)8      | 8  | 112759 | 112766 | SSC |
| p1 | (C)8      | 8  | 115512 | 115519 | SSC |
| p1 | (A)8      | 8  | 115569 | 115576 | SSC |
| p3 | (TTC)3    | 9  | 119009 | 119017 | SSC |

|    |           |    |        |        |     |
|----|-----------|----|--------|--------|-----|
| p1 | (T)8      | 8  | 119878 | 119885 | SSC |
| p3 | (AGC)3    | 9  | 120139 | 120147 | SSC |
| p2 | (TC)5     | 10 | 121404 | 121413 | SSC |
| p1 | (T)10     | 10 | 121986 | 121995 | SSC |
| p2 | (AT)4     | 8  | 122620 | 122627 | SSC |
| p1 | (T)13     | 13 | 123027 | 123039 | SSC |
| p1 | (T)10     | 10 | 123558 | 123567 | SSC |
| p2 | (TA)4     | 8  | 123650 | 123657 | SSC |
| p1 | (A)8      | 8  | 123747 | 123754 | SSC |
| p2 | (AT)4     | 8  | 124015 | 124022 | SSC |
| p1 | (T)11     | 11 | 124685 | 124695 | SSC |
| p3 | (CTT)3    | 9  | 124706 | 124714 | SSC |
| p2 | (AT)4     | 8  | 124822 | 124829 | SSC |
| p3 | (CTT)3    | 9  | 124882 | 124890 | SSC |
| p1 | (T)9      | 9  | 125057 | 125065 | SSC |
| p1 | (T)11     | 11 | 125228 | 125238 | SSC |
| p1 | (T)9      | 9  | 125341 | 125349 | SSC |
| p1 | (T)9      | 9  | 125351 | 125359 | SSC |
| p3 | (TTC)3    | 9  | 125836 | 125844 | SSC |
| p1 | (A)9      | 9  | 125963 | 125971 | SSC |
| p3 | (TTC)3    | 9  | 126408 | 126416 | SSC |
| p1 | (T)10     | 10 | 126562 | 126571 | SSC |
| p1 | (T)13     | 13 | 126736 | 126748 | SSC |
| p1 | (A)10     | 10 | 126900 | 126909 | SSC |
| p3 | (TTG)3    | 9  | 127459 | 127467 | IRb |
| p1 | (A)8      | 8  | 128808 | 128815 | IRb |
| p1 | (T)8      | 8  | 129205 | 129212 | IRb |
| p2 | (AG)4     | 8  | 130950 | 130957 | IRb |
| p3 | (CAG)3    | 9  | 132496 | 132504 | IRb |
| p2 | (TC)4     | 8  | 134560 | 134567 | IRb |
| p1 | (G)8      | 8  | 136481 | 136488 | IRb |
| p3 | (CTT)3    | 9  | 136875 | 136883 | IRb |
| p6 | (TAAGAA)3 | 18 | 139817 | 139834 | IRb |
| p3 | (TTC)3    | 9  | 140094 | 140102 | IRb |
| p3 | (TCT)3    | 9  | 141554 | 141562 | IRb |
| p2 | (TA)4     | 8  | 144121 | 144128 | IRb |
| p3 | (TTC)3    | 9  | 144945 | 144953 | IRb |
| p1 | (T)8      | 8  | 146113 | 146120 | IRb |
| p3 | (TCA)3    | 9  | 146160 | 146168 | IRb |
| p3 | (ACC)3    | 9  | 146402 | 146410 | IRb |
| p3 | (AAG)3    | 9  | 146666 | 146674 | IRb |
| p3 | (AGA)3    | 9  | 146778 | 146786 | IRb |
| p2 | (TC)4     | 8  | 147468 | 147475 | IRb |
| p1 | (T)9      | 9  | 148718 | 148726 | IRb |



|    |        |   |        |        |     |
|----|--------|---|--------|--------|-----|
| p1 | (C)8   | 8 | 148862 | 148869 | IRb |
| p3 | (TTG)3 | 9 | 149387 | 149395 | IRb |
| p2 | (CT)4  | 8 | 149619 | 149626 | IRb |
| p2 | (TC)4  | 8 | 150607 | 150614 | IRb |
| p2 | (TC)4  | 8 | 150619 | 150626 | IRb |
| p1 | (A)9   | 9 | 151264 | 151272 | IRb |
| p3 | (GAA)3 | 9 | 152703 | 152711 | IRb |
| p1 | (A)9   | 9 | 152846 | 152854 | IRb |

---

**Table S5.** Simple sequence repeats (SSRs) in the chloroplast genome of *P. orientale*.

| SSR type | SSR     | size(bp) | start | end   | Region |
|----------|---------|----------|-------|-------|--------|
| p1       | (A)10   | 10       | 1600  | 1609  | LSC    |
| p3       | (GAA)3  | 9        | 2010  | 2018  | LSC    |
| p1       | (T)9    | 9        | 2184  | 2192  | LSC    |
| p3       | (GAA)3  | 9        | 2822  | 2830  | LSC    |
| p1       | (T)8    | 8        | 3206  | 3213  | LSC    |
| p3       | (ATA)3  | 9        | 3546  | 3554  | LSC    |
| p2       | (AT)4   | 8        | 6373  | 6380  | LSC    |
| p1       | (T)8    | 8        | 6578  | 6585  | LSC    |
| p1       | (A)16   | 16       | 7158  | 7173  | LSC    |
| p1       | (A)10   | 10       | 7485  | 7494  | LSC    |
| p1       | (A)9    | 9        | 8065  | 8073  | LSC    |
| p1       | (T)9    | 9        | 8372  | 8380  | LSC    |
| p3       | (AAC)3  | 9        | 8481  | 8489  | LSC    |
| p1       | (A)12   | 12       | 8755  | 8766  | LSC    |
| p1       | (A)8    | 8        | 8899  | 8906  | LSC    |
| p1       | (T)14   | 14       | 8916  | 8929  | LSC    |
| p1       | (T)8    | 8        | 9293  | 9300  | LSC    |
| p1       | (T)9    | 9        | 9645  | 9653  | LSC    |
| p1       | (T)8    | 8        | 12249 | 12256 | LSC    |
| p1       | (T)9    | 9        | 13035 | 13043 | LSC    |
| p1       | (T)8    | 8        | 13060 | 13067 | LSC    |
| p1       | (A)8    | 8        | 13202 | 13209 | LSC    |
| p4       | (AAAT)3 | 12       | 13668 | 13679 | LSC    |
| p4       | (GGTT)3 | 12       | 14256 | 14267 | LSC    |
| p3       | (AAC)3  | 9        | 14758 | 14766 | LSC    |
| p3       | (TTA)3  | 9        | 15568 | 15576 | LSC    |
| p2       | (CT)4   | 8        | 17453 | 17460 | LSC    |
| p3       | (AGA)3  | 9        | 17658 | 17666 | LSC    |
| p1       | (C)8    | 8        | 17976 | 17983 | LSC    |
| p1       | (T)9    | 9        | 18397 | 18405 | LSC    |
| p1       | (T)11   | 11       | 18503 | 18513 | LSC    |
| p1       | (A)8    | 8        | 18646 | 18653 | LSC    |
| p2       | (AT)4   | 8        | 19786 | 19793 | LSC    |
| p2       | (AT)5   | 10       | 19876 | 19885 | LSC    |
| p3       | (TTC)3  | 9        | 22130 | 22138 | LSC    |
| p1       | (A)8    | 8        | 22314 | 22321 | LSC    |
| p1       | (T)8    | 8        | 26008 | 26015 | LSC    |
| p1       | (T)10   | 10       | 26112 | 26121 | LSC    |
| p3       | (TAT)3  | 9        | 27027 | 27035 | LSC    |
| p1       | (A)10   | 10       | 27263 | 27272 | LSC    |
| p2       | (AT)5   | 10       | 27350 | 27359 | LSC    |

|    |             |    |       |       |     |
|----|-------------|----|-------|-------|-----|
| p1 | (A)8        | 8  | 27666 | 27673 | LSC |
| p3 | (TCT)3      | 9  | 29018 | 29026 | LSC |
| p1 | (A)8        | 8  | 29174 | 29181 | LSC |
| p4 | (AGAT)3     | 12 | 29642 | 29653 | LSC |
| p3 | (TTA)3      | 9  | 30190 | 30198 | LSC |
| p1 | (A)8        | 8  | 30980 | 30987 | LSC |
| p1 | (A)9        | 9  | 31074 | 31082 | LSC |
| p3 | (TTA)3      | 9  | 31412 | 31420 | LSC |
| p1 | (A)9        | 9  | 32076 | 32084 | LSC |
| p2 | (GA)5       | 10 | 32307 | 32316 | LSC |
| p1 | (G)8        | 8  | 34168 | 34175 | LSC |
| p2 | (GA)4       | 8  | 35206 | 35213 | LSC |
| p1 | (A)8        | 8  | 36075 | 36082 | LSC |
| p3 | (TCT)3      | 9  | 36817 | 36825 | LSC |
| p3 | (TAT)3      | 9  | 36868 | 36876 | LSC |
| p3 | (ATG)3      | 9  | 38361 | 38369 | LSC |
| p3 | (TTG)3      | 9  | 39966 | 39974 | LSC |
| p3 | (GCA)3      | 9  | 40259 | 40267 | LSC |
| p3 | (ACC)3      | 9  | 41077 | 41085 | LSC |
| p1 | (T)10       | 10 | 41737 | 41746 | LSC |
| p1 | (T)8        | 8  | 43576 | 43583 | LSC |
| p1 | (A)8        | 8  | 44114 | 44121 | LSC |
| p4 | (AACA)3     | 12 | 44494 | 44505 | LSC |
| p3 | (TAT)3      | 9  | 44511 | 44519 | LSC |
| p2 | (TA)4       | 8  | 45489 | 45496 | LSC |
| p2 | (AT)4       | 8  | 46144 | 46151 | LSC |
| p1 | (A)8        | 8  | 46540 | 46547 | LSC |
| p1 | (A)8        | 8  | 46764 | 46771 | LSC |
| p2 | (TA)4       | 8  | 47767 | 47774 | LSC |
| p1 | (T)9        | 9  | 47861 | 47869 | LSC |
| p1 | (A)8        | 8  | 50113 | 50120 | LSC |
| p1 | (T)9        | 9  | 51410 | 51418 | LSC |
| p1 | (T)9        | 9  | 52355 | 52363 | LSC |
| p1 | (T)10       | 10 | 54592 | 54601 | LSC |
| p3 | (AGA)3      | 9  | 57720 | 57728 | LSC |
| p1 | (A)8        | 8  | 58629 | 58636 | LSC |
| p1 | (A)9        | 9  | 61397 | 61405 | LSC |
| p2 | (AC)4       | 8  | 61948 | 61955 | LSC |
| p1 | (A)9        | 9  | 62590 | 62598 | LSC |
| p2 | (TC)4       | 8  | 63271 | 63278 | LSC |
| p2 | (TA)4       | 8  | 64042 | 64049 | LSC |
| p3 | (GTA)3      | 9  | 64083 | 64091 | LSC |
| c* | (CCT)3(T)8* | 16 | 65475 | 65490 | LSC |
| p2 | (GT)4       | 8  | 66946 | 66953 | LSC |

|    |        |    |        |        |     |
|----|--------|----|--------|--------|-----|
| p3 | (AAC)3 | 9  | 67247  | 67255  | LSC |
| p3 | (ATT)3 | 9  | 67522  | 67530  | LSC |
| p1 | (A)9   | 9  | 70223  | 70231  | LSC |
| p1 | (T)8   | 8  | 73864  | 73871  | LSC |
| p2 | (TA)4  | 8  | 77034  | 77041  | LSC |
| p1 | (T)8   | 8  | 77326  | 77333  | LSC |
| p1 | (T)8   | 8  | 77919  | 77926  | LSC |
| p1 | (A)8   | 8  | 78715  | 78722  | LSC |
| p3 | (GGA)3 | 9  | 78992  | 79000  | LSC |
| p1 | (T)9   | 9  | 79534  | 79542  | LSC |
| p1 | (T)9   | 9  | 81327  | 81335  | LSC |
| p1 | (A)8   | 8  | 81664  | 81671  | LSC |
| p2 | (CT)4  | 8  | 82457  | 82464  | LSC |
| p2 | (TA)4  | 8  | 82483  | 82490  | LSC |
| p3 | (TGC)3 | 9  | 82699  | 82707  | LSC |
| p3 | (TTA)4 | 12 | 82932  | 82943  | LSC |
| p1 | (T)9   | 9  | 83203  | 83211  | IRa |
| p3 | (CTT)3 | 9  | 83345  | 83353  | IRa |
| p1 | (T)9   | 9  | 84785  | 84793  | IRa |
| p2 | (GA)4  | 8  | 85431  | 85438  | IRa |
| p2 | (GA)4  | 8  | 85443  | 85450  | IRa |
| p2 | (GA)4  | 8  | 86430  | 86437  | IRa |
| p3 | (CAA)3 | 9  | 86662  | 86670  | IRa |
| p1 | (G)8   | 8  | 87194  | 87201  | IRa |
| p1 | (A)9   | 9  | 87337  | 87345  | IRa |
| p2 | (GA)4  | 8  | 88588  | 88595  | IRa |
| p3 | (TCT)3 | 9  | 89277  | 89285  | IRa |
| p3 | (CTT)3 | 9  | 89389  | 89397  | IRa |
| p3 | (TGA)3 | 9  | 89895  | 89903  | IRa |
| p1 | (A)8   | 8  | 89943  | 89950  | IRa |
| p3 | (GAA)3 | 9  | 91110  | 91118  | IRa |
| p2 | (TA)4  | 8  | 91935  | 91942  | IRa |
| p3 | (AGA)3 | 9  | 94510  | 94518  | IRa |
| p3 | (AGA)3 | 9  | 95970  | 95978  | IRa |
| p3 | (AAG)3 | 9  | 99181  | 99189  | IRa |
| p1 | (C)8   | 8  | 99554  | 99561  | IRa |
| p2 | (AG)4  | 8  | 101474 | 101481 | IRa |
| p3 | (CTG)3 | 9  | 103538 | 103546 | IRa |
| p2 | (CT)4  | 8  | 105085 | 105092 | IRa |
| p3 | (CAA)3 | 9  | 108572 | 108580 | IRa |
| p1 | (A)8   | 8  | 109057 | 109064 | SSC |
| p1 | (A)8   | 8  | 109727 | 109734 | SSC |
| p1 | (T)8   | 8  | 109747 | 109754 | SSC |
| p1 | (T)10  | 10 | 109832 | 109841 | SSC |

|    |        |    |        |        |     |
|----|--------|----|--------|--------|-----|
| p3 | (AAT)3 | 9  | 110173 | 110181 | SSC |
| p3 | (TAA)3 | 9  | 110670 | 110678 | SSC |
| p1 | (T)9   | 9  | 111256 | 111264 | SSC |
| p3 | (TTA)4 | 12 | 111493 | 111504 | SSC |
| p1 | (T)8   | 8  | 112710 | 112717 | SSC |
| p1 | (C)8   | 8  | 115477 | 115484 | SSC |
| p1 | (T)16  | 16 | 117102 | 117117 | SSC |
| p1 | (T)9   | 9  | 117906 | 117914 | SSC |
| p3 | (TTC)3 | 9  | 118969 | 118977 | SSC |
| p1 | (A)10  | 10 | 119490 | 119499 | SSC |
| p1 | (T)8   | 8  | 119838 | 119845 | SSC |
| p3 | (AGC)3 | 9  | 120099 | 120107 | SSC |
| p2 | (TC)5  | 10 | 121364 | 121373 | SSC |
| p1 | (T)8   | 8  | 122182 | 122189 | SSC |
| p2 | (AT)4  | 8  | 122568 | 122575 | SSC |
| p1 | (T)17  | 17 | 123485 | 123501 | SSC |
| p1 | (A)10  | 10 | 123674 | 123683 | SSC |
| p2 | (AT)4  | 8  | 123942 | 123949 | SSC |
| p1 | (T)9   | 9  | 124118 | 124126 | SSC |
| p3 | (CTT)3 | 9  | 124633 | 124641 | SSC |
| p2 | (AT)4  | 8  | 124749 | 124756 | SSC |
| p1 | (T)9   | 9  | 124984 | 124992 | SSC |
| p1 | (T)9   | 9  | 125146 | 125154 | SSC |
| p1 | (T)8   | 8  | 125263 | 125270 | SSC |
| p1 | (T)9   | 9  | 125272 | 125280 | SSC |
| p3 | (TTC)3 | 9  | 125757 | 125765 | SSC |
| p1 | (A)9   | 9  | 125878 | 125886 | SSC |
| p1 | (A)8   | 8  | 125906 | 125913 | SSC |
| p3 | (TCT)3 | 9  | 126429 | 126437 | SSC |
| p1 | (T)13  | 13 | 126477 | 126489 | SSC |
| p1 | (T)14  | 14 | 126654 | 126667 | SSC |
| p1 | (A)10  | 10 | 126818 | 126827 | SSC |
| p3 | (TTG)3 | 9  | 127371 | 127379 | IRb |
| p2 | (AG)4  | 8  | 130859 | 130866 | IRb |
| p3 | (CAG)3 | 9  | 132405 | 132413 | IRb |
| p2 | (TC)4  | 8  | 134469 | 134476 | IRb |
| p1 | (G)8   | 8  | 136390 | 136397 | IRb |
| p3 | (CTT)3 | 9  | 136762 | 136770 | IRb |
| p3 | (TTC)3 | 9  | 139972 | 139980 | IRb |
| p3 | (TCT)3 | 9  | 141433 | 141441 | IRb |
| p2 | (TA)4  | 8  | 144009 | 144016 | IRb |
| p3 | (TTC)3 | 9  | 144833 | 144841 | IRb |
| p1 | (T)8   | 8  | 146001 | 146008 | IRb |
| p3 | (TCA)3 | 9  | 146048 | 146056 | IRb |

|    |        |   |        |        |     |
|----|--------|---|--------|--------|-----|
| p3 | (AAG)3 | 9 | 146554 | 146562 | IRb |
| p3 | (AGA)3 | 9 | 146666 | 146674 | IRb |
| p2 | (TC)4  | 8 | 147356 | 147363 | IRb |
| p1 | (T)9   | 9 | 148606 | 148614 | IRb |
| p1 | (C)8   | 8 | 148750 | 148757 | IRb |
| p3 | (TTG)3 | 9 | 149281 | 149289 | IRb |
| p2 | (CT)4  | 8 | 149513 | 149520 | IRb |
| p2 | (TC)4  | 8 | 150501 | 150508 | IRb |
| p2 | (TC)4  | 8 | 150513 | 150520 | IRb |
| p1 | (A)9   | 9 | 151158 | 151166 | IRb |
| p3 | (GAA)3 | 9 | 152597 | 152605 | IRb |
| p1 | (A)9   | 9 | 152740 | 152748 | IRb |

---

**Table S6.** Primer sequences at the boundaries between SC and IR regions.

| <b>Species</b>      | <b>Regions</b> | <b>Forward/Reverse</b> | <b>Primer sequence (5' to 3')</b> |
|---------------------|----------------|------------------------|-----------------------------------|
| <i>P. rhoeas</i>    | LSC-IRa        | F                      | GCTGCTGCCGAATAAACCAA              |
|                     |                | R                      | AAGAGGGTAAATCGGCCACA              |
|                     | IRa-SSC        | F                      | ACCGAGTTCAACATTAGCCAGA            |
|                     |                | R                      | CGAGCAATTCCGTTGATTGGT             |
|                     | SSC-IRb        | F                      | TTCAGGGAGGCAGTCTTGTT              |
|                     |                | R                      | ACCGAGTTCAACATTAGCCAG             |
|                     | IRb-LSC        | F                      | AAGAGGGTAAATCGGCCACA              |
|                     |                | R                      | GAAGCTCCATCCACAAACGG              |
| <i>P. orientale</i> | LSC-IRa        | F                      | GCTGCTGCCGAATAAACCAA              |
|                     |                | R                      | AAGAGGGTAAATCGGCCACA              |
|                     | IRa-SSC        | F                      | ACCGAGTTCAACATTAGCCAGA            |
|                     |                | R                      | CGAGCAATTCCGTTGATTGGT             |
|                     | SSC-IRb        | F                      | GCAGGCAGTCTTGTTTCAGTC             |
|                     |                | R                      | CCGAGTTCAACATTAGCCAGATT           |
|                     | IRb-LSC        | F                      | AAGAGGGTAAATCGGCCACA              |
|                     |                | R                      | TGTCGAAGCTCCATCCACAA              |

**Table S7. GenBank accession numbers of dicots with complete chloroplast genome sequences used for phylogenetic analyses.**

| GenBank acc. | Species                            | GenBank acc. | Species                          |
|--------------|------------------------------------|--------------|----------------------------------|
| NC_029829    | <i>Aconitum chiisanense</i>        | NC_026076    | <i>Paeonia obovata</i>           |
| NC_033913    | <i>Akebia quinata</i>              | NC_026447    | <i>Panax notoginseng</i>         |
| NC_029391    | <i>Angelica acutiloba</i>          | NC_029434    | <i>Papaver somniferum</i>        |
| NC_022457    | <i>Berberis bealei</i>             | NC_008796    | <i>Ranunculus macranthus</i>     |
| NC_009599    | <i>Buxus microphylla</i>           | NC_027728    | <i>Rheum palmatum</i>            |
| NC_034950    | <i>Chenopodium album</i>           | NC_029431    | <i>Sabia yunnanensis</i>         |
| NC_035872    | <i>Circaea agrestis</i>            | NC_027224    | <i>Salicornia brachiata</i>      |
| NC_031446    | <i>Coreanomecon hylomeconoides</i> | NC_020431    | <i>Salvia miltiorrhiza</i>       |
| NC_035941    | <i>Decaisnea insignis</i>          | NC_026065    | <i>Sedum takesimense</i>         |
| NC_029428    | <i>Epimedium sagittatum</i>        | NC_027732    | <i>Sinopodophyllum hexandrum</i> |
| NC_029469    | <i>Foeniculum vulgare</i>          | NC_029432    | <i>Stephania japonica</i>        |
| NC_027669    | <i>Haloxylon persicum</i>          | NC_031849    | <i>Trollius chinensis</i>        |
| NC_035873    | <i>Kingdonia uniflora</i>          | NC_025339    | <i>Nelumbo nucifera</i>          |
| NC_029394    | <i>Ligusticum tenuissimum</i>      | NC_032031    | <i>Oxyria sinensis</i>           |
| NC_008336    | <i>Nandina domestica</i>           | NC_029433    | <i>Pachysandra terminalis</i>    |
